# Supplementary material for: Prognosis Factors of Patients Undergoing Renal Replacement Therapy
Source: MDPI journal article supplement (doi:10.3390/jpm13040605), 2023-03-30

## SUPPLEMENTAL MATERIAL

Table S1: Bivariate analysis of factors related to renal transplantation.

|                                       | Renal transplantation<br>N= 3,776 |              | No renal transplantation<br>N= 7,735 |              | p value |
|---------------------------------------|-----------------------------------|--------------|--------------------------------------|--------------|---------|
|                                       | N (%)                             | CI 95%       | N (%)                                | CI 95%       |         |
| Sex                                   |                                   |              |                                      |              |         |
| Male                                  | 2405 (63.7)                       | (62.1; 65.2) | 4853 (62.4)                          | (61.3; 63.5) | 0.184   |
| Female                                | 1371 (36.3)                       | (34.8; 37.9) | 2922 (37.6)                          | (36.5; 37.7) |         |
| Occupational Status                   |                                   |              |                                      |              |         |
| Active                                | 925 (48.0)                        | (45.8; 50.2) | 308 (7.7)                            | (6.9; 8.6)   | <0.001  |
| Inactive                              | 1003 (52.0)                       | (49.8; 54.2) | 3674 (92.3)                          | (91.4; 93.1) |         |
| Comorbidities                         |                                   |              |                                      |              |         |
| Median Charlson index score           | 3.8                               | (3.8; 3.9)   | 7.0                                  | (7.0; 7.1)   | <0.001  |
| Diabetes mellitus                     | 979 (21.1)                        | (19.8; 22.4) | 3646 (46.9)                          | (45.8; 48.0) | <0.001  |
| Congestive heart failure              | 175 (4.6)                         | (4.0; 5.3)   | 2009 (25.8)                          | (24.9; 26.8) | <0.001  |
| Myocardial infarction                 | 217 (5.7)                         | (5.0; 6.5)   | 1849 (23.8)                          | (22.8; 24.7) | <0.001  |
| Peripheral vascular disease           | 175 (4.6)                         | (4.0; 5.3)   | 1562 (20.1)                          | (19.2; 21.0) | <0.001  |
| COPD                                  | 188 (5.0)                         | (4.3; 5.7)   | 1218 (15.7)                          | (14.9; 16.5) | <0.001  |
| Solid tumor localized                 | 124 (3.3)                         | (2.8; 3.9)   | 907 (11.7)                           | (11.0; 12.4) | <0.001  |
| Cerebrovascular accident              | 139 (3.7)                         | (3.1; 4.3)   | 844 (10.9)                           | (10.2; 11.6) | <0.001  |
| Connective tissue disease             | 169 (4.5)                         | (3.9; 5.2)   | 307 (3.9)                            | (3.5; 4.4)   | 0.181   |
| Peptic ulcer disease                  | 75 (2.0)                          | (1.6; 2.5)   | 297 (3.8)                            | (3.4; 4.3)   | <0.001  |
| Mild Liver disease                    | 76 (2.0)                          | (1.6; 2.5)   | 312 (4.0)                            | (3.6; 4.5)   | <0.001  |
| Moderate to severe liver disease      | 45 (1.2)                          | (0.9; 1.6)   | 150 (1.9)                            | (1.6; 2.3)   | 0.004   |
| Leukemia/lymphoma                     | 9 (0.2)                           | (0.1; 0.4)   | 166 (2.1)                            | (1.8; 2.5)   | <0.001  |
| Dementia                              | 2 (0.1)                           | (0.0; 0.2)   | 196 (1.9)                            | (1.6; 2.2)   | <0.001  |
| Solid tumor metastatic                | 2 (0.1)                           | (0.0; 0.2)   | 115 (1.5)                            | (1.2; 1.8)   | <0.001  |
| HIV                                   | 18 (0.5)                          | (0.3; 0.7)   | 78 (1.0)                             | (0.8; 1.2)   | 0.003   |
| AIDS                                  | 4 (0.1)                           | (0.0; 0.3)   | 19 (0.2)                             | (0.2; 0.4)   | 0.117   |
| HBV                                   | 38 (1.0)                          | (0.7; 1.4)   | 101 (1.3)                            | (1.1; 1.6)   | 0.176   |
| HCV                                   | 75 (2.0)                          | (1.6; 2.5)   | 296 (3.8)                            | (3.4; 4.2)   | <0.001  |
| End stage kidney disease etiology     |                                   |              |                                      |              | <0.001  |
| Diabetic Nephropathies                | 587 (15.5)                        | (14.4; 16.7) | 2245 (28.9)                          | (27.9; 29.9) |         |
| Glomerular disease                    | 944 (25.0)                        | (23.6; 26.4) | 803 (10.3)                           | (9.7; 11.0)  |         |
| Hypertension and renovascular disease | 340 (9.0)                         | (8.1; 9.9)   | 1344 (17.3)                          | (16.5; 18.1) |         |
| Renal tubulo-interstitial nephropathy | 400 (10.6)                        | (9.6; 11.6)  | 822 (10.6)                           | (9.9; 11.3)  |         |

|                                           | Renal transplantation<br>N= 3,776 |              | No renal transplantation<br>N= 7,735 |              | p value |
|-------------------------------------------|-----------------------------------|--------------|--------------------------------------|--------------|---------|
|                                           | N (%)                             | CI 95%       | N (%)                                | CI 95%       |         |
| Familial / hereditary nephropathies       | 669 (17.7)                        | (16.5; 19.0) | 302 (3.9)                            | (3.5; 4.3)   | 0.002   |
| Systemic diseases affecting the kidney    | 47 (1.2)                          | (0.9; 1.6)   | 342 (4.4)                            | (4.0; 4.9)   |         |
| Miscellaneous renal disorders             | 70 (1.9)                          | (1.5; 2.3)   | 235 (3.0)                            | (2.7; 3.4)   |         |
| Chronic renal failure; etiology uncertain | 719 (19.0)                        | (17.8; 20.3) | 1682 (21.6)                          | (20.9; 23.2) |         |
| End stage kidney disease follow-up        |                                   |              |                                      |              |         |
| Without previous follow up                | 334 (8.8)                         | (8.0; 9.8)   | 1207 (15.5)                          | (14.7; 16.3) |         |
| ESKD ≤ 6 month of follow-up               | 531 (14.1)                        | (13.0; 15.2) | 1012(13.0)                           | (12.3; 13.8) |         |
| ESKD > 6 month of follow-up               | 2911 (77.1)                       | (75.7; 78.4) | 5556 (71.5)                          | (70.4; 72.5) |         |
| Renal replacement therapy at start        |                                   |              |                                      |              |         |
| Median age onset RRT                      | 51.0                              | (50.6; 51.5) | 68.2                                 | (68.0; 68.6) | <0.001  |
| Programed                                 | 3014 (80.7)                       | (79.4; 82.0) | 4740 (61.5)                          | (60.4; 62.6) | <0.001  |
| Not programed                             | 720 (19.3)                        | (18.0; 20.6) | 2963 (38.5)                          | (37.4; 39.6) |         |
| Vital Status                              |                                   |              |                                      |              |         |
| Age at death (median)                     | 65.4                              | (64.4; 66.5) | 73.3                                 | (73.0; 73.6) | <0.001  |
| Alive                                     | 3413 (90.4)                       | (89.4;91.3)  | 3238 (41.6)                          | (40.6;42.7)  | <0.001  |

Figure S1: ROC curve of multivariate analysis.

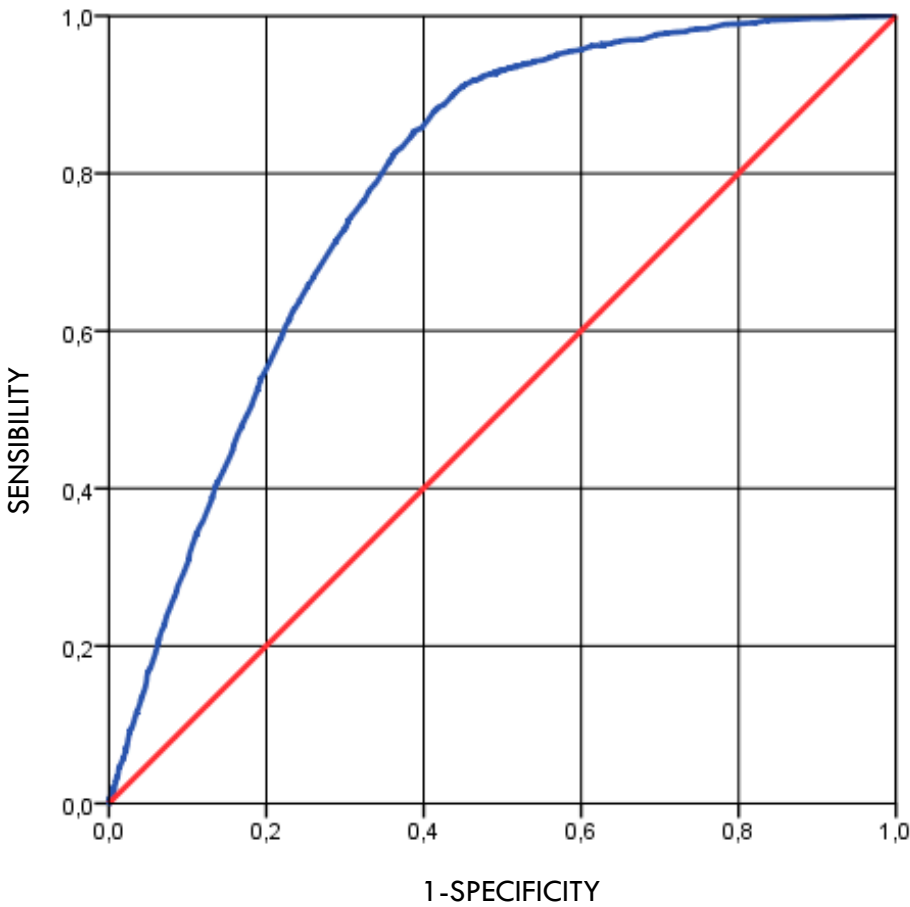

Supplement: s1 [file s1]
